# Supplementary material for: Dispersal and Land Cover Contribute to Pseudorabies Virus Exposure in Invasive Wild Pigs
Source: PubMed Central journal article supplement (PMC8192353; doi:10.1007/s10393-020-01508-6), 2021-01-14
Supplement: 10393_2020_1508_MOESM3_ESM.pdf [file 10393_2020_1508_MOESM3_ESM.pdf]

**Article title:**

Dispersal and land cover contribute to pathogen exposure in invasive wild pigs

**Journal name:**

Ecohealth

**Author names:**

Felipe A. Hernández, Amanda N. Carr, Michael P. Milleson, Hunter R. Merrill, Michael L. Avery, Brandon M. Parker, Cortney L. Pylant, James D. Austin, Samantha M. Wisely

**Affiliation and e-mail address of the corresponding author:**

School of Natural Resources and Environment, University of Florida, 103 Black Hall, PO Box 116455, Gainesville, Florida 32611, USA

Department of Wildlife Ecology and Conservation, University of Florida, 110 Newins-Ziegler Hall, PO Box 110430, Gainesville, Florida 32611, USA

wisely@ufl.edu

### Online Resource 3

Percentage (95% confidence interval) of wild pigs that exhibited PrV- and *Brucella* spp.-specific antibodies, mean ( $\pm$ SE) probability of recent (first or second-generation) individual migration and proportion of land cover types across 23 sampling locations

| Site | PrV                | <i>Brucella</i> spp. | Individual ancestry | Hardwood forest | Pine, prairie, and scrub (open canopy) | Freshwater wetland | Lake and river | Agriculture | Anthropogenic |
|------|--------------------|----------------------|---------------------|-----------------|----------------------------------------|--------------------|----------------|-------------|---------------|
| 1    | 72.7 (57.2 - 85.0) | 4.7 (0.6 - 15.8)     | 0.19 $\pm$ 0.05     | 0.002           | 0.560                                  | 0.384              | 0.001          | 0.020       | 0.033         |
| 2    | 87.5 (61.7 - 98.4) | 17.6 (3.8 - 43.4)    | 1                   | 0.032           | 0.035                                  | 0.224              | 0.010          | 0.560       | 0.139         |
| 3    | 7.7 (0.2 - 36.0)   | 7.7 (0.2 - 36.0)     | 0.15 $\pm$ 0.10     | 0.001           | 0.145                                  | 0.050              | 0.046          | 0.000       | 0.184         |
| 4    | 66.7 (9.4 - 99.2)  | 0                    | 1                   | 0.032           | 0.160                                  | 0.279              | 0.017          | 0.125       | 0.378         |
| 5    | 55.6 (21.2 - 86.3) | 0                    | 0.98 $\pm$ 0.01     | 0.029           | 0.219                                  | 0.284              | 0.051          | 0.161       | 0.255         |
| 6    | 38.5 (13.9 - 68.4) | 15.4 (1.9 - 45.4)    | 0.29 $\pm$ 0.11     | 0.152           | 0.063                                  | 0.163              | 0.021          | 0.118       | 0.483         |
| 7    | 60.0 (14.7 - 94.7) | 40.0 (5.3 - 85.3)    | 1                   | 0.258           | 0.028                                  | 0.540              | 0.033          | 0.045       | 0.096         |
| 8    | 60.0 (44.3 - 74.3) | 4.5 (0.6 - 15.5)     | 0.09 $\pm$ 0.03     | 0.002           | 0.376                                  | 0.574              | 0.002          | 0.001       | 0.045         |
| 9    | 100                | 60 (14.7 - 94.7)     | 1                   | 0.186           | 0.234                                  | 0.149              | 0.010          | 0.158       | 0.263         |
| 10   | 23.1 (5.0 - 53.8)  | 0                    | 0.11 $\pm$ 0.08     | 0.005           | 0.238                                  | 0.364              | 0.019          | 0.055       | 0.314         |
| 11   | 40.0 (12.2 - 73.8) | 0                    | 1                   | 0.004           | 0.289                                  | 0.688              | 0.004          | 0.000       | 0.015         |
| 12   | 80.0 (28.4 - 99.5) | 0                    | 1                   | 0.008           | 0.458                                  | 0.343              | 0.000          | 0.116       | 0.075         |
| 13   | 70.0 (45.7 - 88.1) | 35 (15.4 - 59.2)     | 0.15 $\pm$ 0.07     | 0.123           | 0.069                                  | 0.382              | 0.103          | 0.207       | 0.116         |
| 14   | 0                  | 0                    | 0                   | 0.107           | 0.269                                  | 0.223              | 0.032          | 0.221       | 0.148         |
| 15   | 64.7 (38.3 - 85.8) | 6.3 (0.2 - 30.2)     | 0.04 $\pm$ 0.04     | 0.067           | 0.144                                  | 0.459              | 0.044          | 0.027       | 0.258         |
| 16   | 41.7 (15.2 - 72.3) | 33.3 (9.9 - 65.1)    | 0.42 $\pm$ 0.13     | 0.115           | 0.311                                  | 0.239              | 0.004          | 0.001       | 0.047         |
| 17   | 20.0 (0.5 - 71.6)  | 0                    | 0.76 $\pm$ 0.05     | 0.019           | 0.121                                  | 0.246              | 0.001          | 0.555       | 0.058         |
| 18   | 0                  | 0                    | 0.04 $\pm$ 0.04     | 0.185           | 0.234                                  | 0.193              | 0.086          | 0.101       | 0.201         |
| 19   | 83.3 (35.9 - 99.6) | 33.3 (4.3 - 77.7)    | 1                   | 0.018           | 0.420                                  | 0.326              | 0.014          | 0.057       | 0.164         |
| 21   | 40.0 (12.2 - 73.8) | 0                    | 1                   | 0.046           | 0.092                                  | 0.367              | 0.030          | 0.351       | 0.114         |
| 22   | 66.7 (22.3 - 95.7) | 33.3 (4.3 - 77.7)    | 1                   | 0.014           | 0.156                                  | 0.775              | 0.025          | 0.003       | 0.028         |
| 23   | 78.9 (54.4 - 93.9) | 11.1 (1.4 - 34.7)    | 1                   | 0.045           | 0.308                                  | 0.307              | 0.007          | 0.110       | 0.222         |
| 24   | 40.0 (5.3 - 85.3)  | 40.0 (5.3 - 85.3)    | 1                   | 0.014           | 0.339                                  | 0.169              | 0.037          | 0.121       | 0.216         |

Values denote predictors of the probability of pseudorabies virus (PrV) exposure after omissions
